# Supplementary material for: Composited analyses of the chemical and physical characteristics of co-polluted days by ozone and PM 2.5 over 2013–2020 in the Beijing–Tianjin–Hebei region
Source: Copernicus journal article supplement (doi:10.5194/acp-2022-557), 2022-09-20
Supplement: Supplementary file [file acp-2022-557-AC1-supplement.pdf]

## Response to Comments of Reviewer #1

**Manuscript number:** acp-2022-557

**Title:** Composited analyses of the chemical and physical characteristics of co-polluted days by ozone and PM<sub>2.5</sub> over 2013–2020 in the Beijing–Tianjin–Hebei region

### General comments:

In this manuscript the chemical and physical characteristics of O<sub>3</sub> (O<sub>3</sub>SPD), PM<sub>2.5</sub> (PM<sub>2.5</sub>SPD) polluted days and O<sub>3</sub> and PM<sub>2.5</sub> (O<sub>3</sub>&PM<sub>2.5</sub>PD) co-polluted days over BTH are investigated by using the 3-D global chemical transport model (GEOS-Chem). This manuscript is clearly written and well organized, and its conclusions are interesting.

Thanks to the referee for the helpful comments and constructive suggestions. We have revised the manuscript carefully and the point-to-point responses are listed below.

### Major concerns/questions:

1. The simulated PM<sub>2.5</sub> components including NO<sub>3</sub><sup>-</sup>, NH<sub>4</sub><sup>+</sup>, SO<sub>4</sub><sup>2-</sup>, BC, and OC are compared against observed PM<sub>2.5</sub> concentrations, and the comparison shows that the simulated PM<sub>2.5</sub> had a NMB of -26.9%. Even with the adjusted thresholds, percentages of observed polluted days for PM<sub>2.5</sub>SPD shown in Figure c are lower than for O<sub>3</sub>SPD and O<sub>3</sub>&PM<sub>2.5</sub>PD. Is the underestimation attributable to some missing primary aerosols?

### Response:

Thanks for pointing this out. In this work we calculated PM<sub>2.5</sub> concentration as the sum of the simulated masses of SO<sub>4</sub><sup>2-</sup>, NO<sub>3</sub><sup>-</sup>, NH<sub>4</sub><sup>+</sup>, BC, and OC as in previous studies (*Yang et al., 2016; Dang et al., 2019; Xie et al., 2022*). Although primary aerosols such as mineral dust and sea salt are not the dominant aerosol species in China (*Xuan et al., 2000; Ye et al., 2003; Duan et al., 2006; Zhao et al., 2013*), the absence of them in the calculation of PM<sub>2.5</sub> contributed to the low biases in simulated PM<sub>2.5</sub>SPD. To clarify this, we have added the following sentences in the first paragraph of Section 3.2.1: “It should be noted that mineral dust and sea-salt aerosols were not considered in this study, because they are not the major aerosol components in China and the concentrations are generally low based on previous measurements (*Xuan et al., 2000; Ye et al., 2003; Duan et al., 2006; Zhao et al., 2013*). However, excluding dust and sea salt may lead to low biases in simulated PM<sub>2.5</sub> concentrations.”.

2. In the analysis two oxidation indicators (sulfur oxidation ratio and nitrogen oxidation ratio) are used, but not assessed. As observed SO<sub>2</sub> and NO<sub>2</sub> concentrations are available at CNEMC, model performance for SO<sub>2</sub> and NO<sub>2</sub> is suggested to be evaluated.

### Response:

Following the Reviewer’s suggestion, we have added Figure S2 in the Supplementary Material to evaluate the model performance for SO<sub>2</sub> and NO<sub>2</sub>. We have also added the following sentences in the second paragraph of Section 3.2.1 to describe the model

performance: “Due to the lack of the publicly accessible long-term observations of PM<sub>2.5</sub> components in China, we compared the simulated SO<sub>2</sub> and NO<sub>2</sub> (precursors for SO<sub>4</sub><sup>2-</sup> and NO<sub>3</sub>) with observations from CNEMC in Fig. S2. The simulated daily mean concentrations of NO<sub>2</sub> (SO<sub>2</sub>) agree well with the observations from CNEMC with R of 0.82 (0.78) and MB of -14.9% (9.3%).”

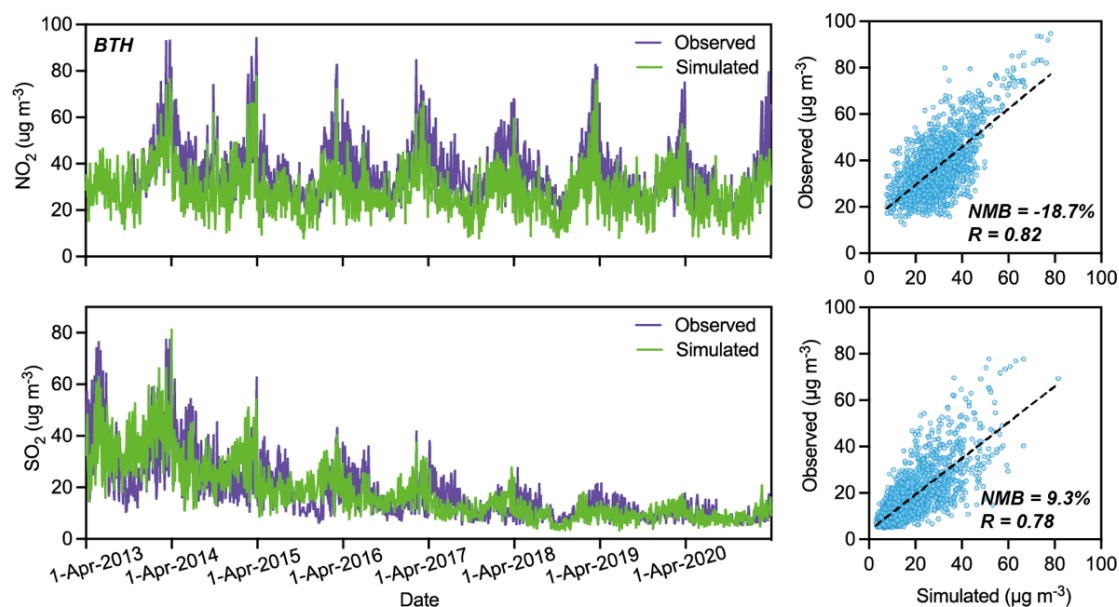

**Figure S2.** Simulated and observed daily mean surface-layer concentrations of NO<sub>2</sub> and SO<sub>2</sub> as well as the scatterplots of simulated versus observed values for April to October of 2013–2020 in BTH.

- Figure S5a shows the hourly variations of PBLH (m) averaged in all model-captured O<sub>3</sub>SPD (blue), PM<sub>2.5</sub>SPD (yellow), and O<sub>3</sub>&PM<sub>2.5</sub>PD (purple). Average PBLH at noon time for O<sub>3</sub>SPD and O<sub>3</sub>&PM<sub>2.5</sub>PD is over 2000m, why are they so high? Figure S5b shows the daily anomaly of PBLH for O<sub>3</sub>SPD and O<sub>3</sub>&PM<sub>2.5</sub>PD at night time exceeds -500m, while at noon time over 1000m. How does PBLH usually change over BTH?

**Response:**

The hourly variations of PBLH were taken from MERRA-2. Hourly PBLH values averaged over all days in the warm months (April-October) of 2013-2020 in BTH are shown in Figure R1. PBLH reached the highest value of 1842 m at 14:00 and the lowest value of 300 m at 6:00. The hourly variation of PBLH over BTH from MERRA-2 agrees closely with observations. *Guo et al. (2016)* used the fine-resolution sounding observations of 391552 profiles from January 2011 to July 2015 across China and reported that PBLH in BTH averaged over summers was around 1600-2000 m at 14:00 and 100-350 m at 2:00. *Tang et al. (2021)* carried out two field campaigns in Shijiazhuang, the area with serious air pollution in BTH, from August 25 to September 19, 2018 (late summer) and from June 8 to July 2, 2019 (early summer). They found that the highest PBLH during the daytime in summer was around 1800 m in O<sub>3</sub> polluted days.

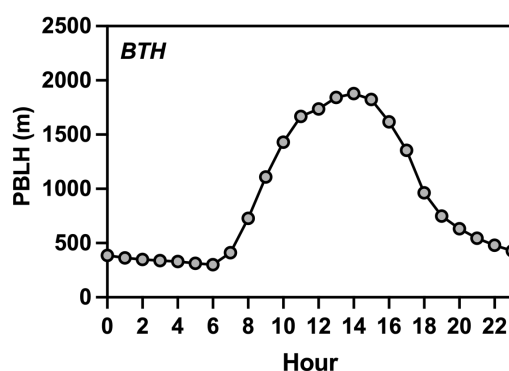

**Figure R1.** Hourly variation of PBLH from MERRA2 averaged over all days in the warm months (April-October) of 2013-2020 in BTH.

4. Figure S6 shows the vertical profile of  $\text{SO}_4^{2-}$  chemical production. Why is  $\text{SO}_4^{2-}$  chemical production larger at high levels than at low levels? Is it associated with cloud or high relative humidity? How is  $\text{SO}_2$  concentration distributed vertically? How to understand the difference between  $\text{O}_3\text{SPD}$  and  $\text{PM}_{2.5}\text{SPD}$ ?

**Response:**

The vertical profile of  $\text{SO}_4^{2-}$  chemical production from aqueous oxidation shown in Figure S6 was associated with cloud and relative humidity (RH) (see Figures R2(a)-R2(c) below). The strongest aqueous chemical production of  $\text{SO}_4^{2-}$  occurred around 819 to 771 hPa where cloud optical depth (OPTDEPTH) and RH peaked. Clouds and high RH were conducive to the aqueous chemical production of  $\text{SO}_4^{2-}$ . As a result,  $\text{SO}_4^{2-}$  chemical production was larger at high levels than at low levels.

Figure R2(d) below shows the vertical distributions of  $\text{SO}_2$  in the model-captured  $\text{O}_3\text{SPD}$ ,  $\text{PM}_{2.5}\text{SPD}$ , and  $\text{O}_3\&\text{PM}_{2.5}\text{PD}$ . For all the cases,  $\text{SO}_2$  concentrations were the highest at the surface, decreased rapidly with height from the surface to 975 hPa, and then declined slowly at 944-819 hPa.

The differences between  $\text{O}_3\text{SPD}$  and  $\text{PM}_{2.5}\text{SPD}$  in Figure S6 indicated in the differences in vertical distribution of the chemical production of  $\text{SO}_4^{2-}$ , which have been explained in the first paragraph of this response.

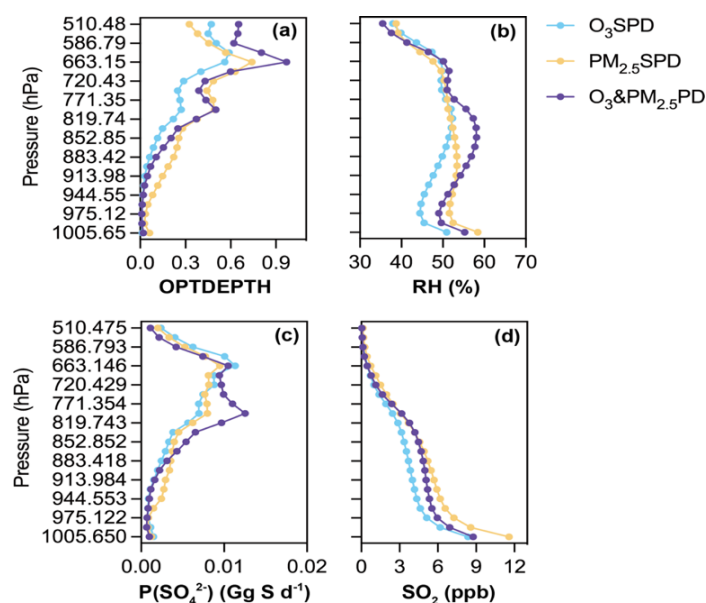

**Figure R2.** The vertical distributions of (a) cloud optical thickness (OPTDEPTH), (b) relative humidity (RH), (c) SO<sub>4</sub><sup>2-</sup> chemical production from aqueous oxidation (P(SO<sub>4</sub><sup>2-</sup>)), and (d) SO<sub>2</sub> averaged over the model-captured O<sub>3</sub>SPD, PM<sub>2.5</sub>SPD, and O<sub>3</sub>&PM<sub>2.5</sub>PD in BTH in the months of April to October of 2013-2020.

- It is interesting to see Figure 8a that O<sub>3</sub> levels for O<sub>3</sub>SPD are lower than for O<sub>3</sub>&PM<sub>2.5</sub>PD. Does it mean high PM<sub>2.5</sub> leads to increase in O<sub>3</sub>? Figure 8b also shows BC is well mixed vertically up to ~819 hPa. Is it an average for all selected days?

**Response:**

In this study, we found that high O<sub>3</sub> levels lead to increases in PM<sub>2.5</sub> in O<sub>3</sub>&PM<sub>2.5</sub>PD for the following reasons: (1) O<sub>3</sub>&PM<sub>2.5</sub>PD occurred with high levels of atmospheric oxidants (OH and O<sub>x</sub>), high SOR and NOR, leading to high concentrations of PM<sub>2.5</sub>, (2) the vertical profiles of NO<sub>3</sub><sup>-</sup>, NH<sub>4</sub><sup>+</sup>, and SO<sub>4</sub><sup>2-</sup> were quite uniform at 975-819 hPa, corresponding to the stable O<sub>3</sub> concentrations at these altitudes, as confirmed by the process analysis.

However, high PM<sub>2.5</sub> concentrations usually lead to reductions in O<sub>3</sub>, as reported by previous studies. *Li et al. (2019)* reported that PM<sub>2.5</sub> influences O<sub>3</sub> chemical production through the uptake of both HO<sub>x</sub> and NO<sub>x</sub> radicals, which suppressed O<sub>3</sub> production under high PM<sub>2.5</sub> (PM<sub>2.5</sub> > 60 μg m<sup>-3</sup>) in the summer of 2013-2018 in the North China Plain. *Yang et al. (2022)* found that the aerosol-photolysis and aerosol-radiation interactions caused significant decreases in daytime surface-layer O<sub>3</sub> concentrations during multi-pollutant air pollution episodes.

Since the concentrations of BC were small and not easily visible in Figure 8b, we present the vertical distributions of BC in Figure R3 below, which are averaged over all selected samples of the three types of pollution (i.e., 2954 samples of O<sub>3</sub>SPD, 2148 samples of PM<sub>2.5</sub>SPD, and 1614 samples of O<sub>3</sub>&PM<sub>2.5</sub>PD). The variation of BC with

altitude was mainly driven by meteorology. The ratio of concentration at 819 to that at 975 hPa for BC and other PM<sub>2.5</sub> components is shown in Table 1 of our manuscript for O<sub>3</sub>SPD, PM<sub>2.5</sub>SPD, and O<sub>3</sub>&PM<sub>2.5</sub>PD. The BC<sub>(819 hPa)</sub>/BC<sub>(975 hPa)</sub> was 0.73, 0.64, and 0.79 in O<sub>3</sub>SPD, PM<sub>2.5</sub>SPD, and O<sub>3</sub>&PM<sub>2.5</sub>PD, respectively. In PM<sub>2.5</sub>SPD, NO<sub>3</sub><sup>-</sup>, NH<sub>4</sub><sup>+</sup>, OC had about the same ratio as BC (0.64) (with large decreases with height), except for SO<sub>4</sub><sup>2-</sup> concentration that had a ratio of 0.81. In O<sub>3</sub>&PM<sub>2.5</sub>PD, the ratios of NO<sub>3</sub><sup>-</sup>, NH<sub>4</sub><sup>+</sup>, SO<sub>4</sub><sup>2-</sup> were, 0.94, 0.91, 0.87, respectively, which were much higher than the value of BC (0.79), indicating NO<sub>3</sub><sup>-</sup>, NH<sub>4</sub><sup>+</sup>, SO<sub>4</sub><sup>2-</sup> were quite uniform in the layers of 975-819 hPa with the influence of chemical processes. We have discussed these characteristics in Section 3.3.4.

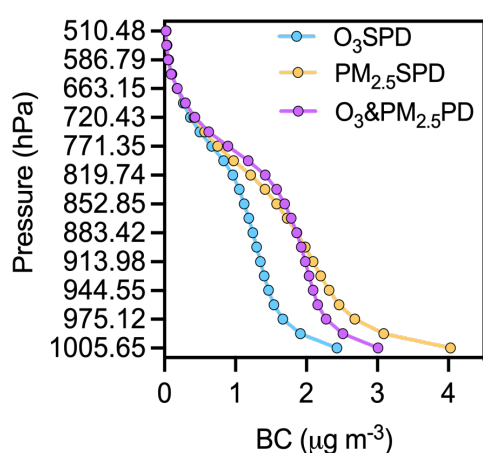

**Figure R3.** The vertical distributions of BC averaged over the model-captured O<sub>3</sub>SPD, PM<sub>2.5</sub>SPD, and O<sub>3</sub>&PM<sub>2.5</sub>PD in BTH in the months of April to October of 2013-2020.

**Table 1.** The ratio of concentration at 819 to that at 975 hPa for NO<sub>3</sub><sup>-</sup>, NH<sub>4</sub><sup>+</sup>, SO<sub>4</sub><sup>2-</sup>, BC, OC, and PM<sub>2.5</sub> averaged over O<sub>3</sub>SPD, PM<sub>2.5</sub>SPD, and O<sub>3</sub>&PM<sub>2.5</sub>PD in BTH.

|                                                      |                                      | NO <sub>3</sub> <sup>-</sup> | NH <sub>4</sub> <sup>+</sup> | SO <sub>4</sub> <sup>2-</sup> | BC   | OC   | PM <sub>2.5</sub> |
|------------------------------------------------------|--------------------------------------|------------------------------|------------------------------|-------------------------------|------|------|-------------------|
| Conc <sub>819 hPa</sub> /<br>Conc <sub>975 hPa</sub> | O <sub>3</sub> SPD                   | 0.95                         | 0.90                         | 0.85                          | 0.73 | 0.73 | 0.86              |
|                                                      | PM <sub>2.5</sub> SPD                | 0.64                         | 0.68                         | 0.81                          | 0.64 | 0.63 | 0.67              |
|                                                      | O <sub>3</sub> &PM <sub>2.5</sub> PD | 0.94                         | 0.91                         | 0.87                          | 0.79 | 0.77 | 0.89              |

### References:

- Dang, R. J., and Liao, H.: Radiative forcing and health impact of aerosols and ozone in China as the consequence of clean air actions over 2012-2017, *Geophys. Res. Lett.*, 46, 12511-12519, <https://doi:10.1029/2019GL084605>, 2019.
- Duan, F., He, K., Ma, Y., Yang, F., Yu, X., Cadle, S. H., Chan, T., and Mulawa, P. A.: Concentration and chemical characteristics of PM<sub>2.5</sub> in Beijing, China: 2001–2002, *Sci. Total Environ.*, 355(1–3), 264–275, <https://doi:10.1016/j.scitotenv.2005.03.001>, 2006.
- Guo, J. P., Miao, Y. C., Zhang, Y., Liu, H., Li, Z. Q., Zhang, W. C., He, J., Lou, M. Y., Yan, Y., Bian, L., and Zhai, P. M.: The climatology of planetary boundary layer

- height in China derived from radiosonde and reanalysis data, *Atmos. Chem. Phys.*, 16, 13309–13319, <https://doi:10.5194/acp-16-13309-2016>, 2016.
- Li, K., Jacob, D. J., Liao, H., Zhu, J., Shah, V., Shen, L., Bates, K., Zhang, Q., and Zhai, S.: A two-pollutant strategy for improving ozone and particulate matter air quality in China, *Nature Geoscience*, 12, 906–910, <https://doi:10.1038/s41561-019-0464-x>, 2019.
- Tang, G., Liu, Y., Huang, X., Wang, Y., Hu, B., Zhang, Y., Song, T., Li, X., Wu, S., Li, Q., Kang, Y., Zhu, Z., Wang, M., Wang, Y., Li, T., Li, X., and Wang, Y.: Aggravated ozone pollution in the strong free convection boundary layer, *Sci. Total Environ.*, 20, 788, 147740, <https://doi:10.1016/j.scitotenv>, 2021.
- Xie, P. F., and Liao, H.: The impacts of changes in anthropogenic emissions over China on PM<sub>2.5</sub> concentrations in South Korea and Japan during 2013–2017, *Front. Environ. Sci.*, 10:841285, <https://doi:10.3389/fenvs.2022.841285>, 2022.
- Xuan, J., Liu, G., and Du, K.: Dust emission inventory in northern China, *Atmos. Environ.*, 34(26), 4565–4570, [https://doi:10.1016/S1352-2310\(00\)00203-X](https://doi:10.1016/S1352-2310(00)00203-X), 2000.
- Yang, H., Chen, L., Liao, H., Zhu, J., Wang, W., and Li, X.: Impacts of aerosol-photolysis interaction and aerosol-radiation feedback on surface-layer ozone in North China during multi-pollutant air pollution episodes, *Atmos. Chem. Phys.*, 22, 4101–4116, <https://doi:10.5194/acp-22-4101-2022>, 2022.
- Yang, Y., Liao, H., and Lou, S. J.: Increase in winter haze over eastern China in the past decades: Roles of variations in meteorological parameters and anthropogenic emissions, *J. Geophys. Res.*, 121, 13050–13065, <https://doi:10.1002/2016JD025136>, 2016.
- Ye, B., Ji, X., Yang, H., Yao, X., Chan, C. K., Cadle, S. H., Chan, T., and Mulawa, P. A.: Concentration and chemical composition of PM<sub>2.5</sub> in Shanghai for a 1-year period, *Atmos. Environ.*, 37(4), 499–510, [https://doi:10.1016/S1352-2310\(02\)00918-4](https://doi:10.1016/S1352-2310(02)00918-4), 2003.
- Zhao, X. J., Zhao, P. S., Xu, J., Meng, W., Pu, W. W., Dong, F., He, D., and Shi, Q. F.: Analysis of a winter regional haze event and its formation mechanism in the North China Plain, *Atmos. Chem. Phys.*, 13, 5685–5696, <https://doi:10.5194/acp-13-5685-2013>, 2013.
